# Supplementary material for: A zinc–air battery assisted self-powered electrochemical sensor for sensitive detection of microcystin-RR
Source: Royal Society of Chemistry journal article supplement (doi:10.1039/d4an00200h), 2024-01-01
Supplement: d4an00200h1.pdf [file d4an00200h1.pdf]

## Electronic Supplementary Information

### Zinc-air battery assisted self-powered electrochemical sensor for sensitive detection of microcystin-RR

Qianjun Wang,<sup>a</sup> Ding Jiang,<sup>a,\*</sup> Xiaojiao Du,<sup>b</sup> Xueling Shan,<sup>a</sup> Wenchang Wang,<sup>a,d</sup> Hiroshi Shiigi,<sup>c</sup> Zhidong Chen<sup>a,\*</sup>

<sup>a</sup> Jiangsu Key Laboratory of Advanced Catalytic Materials and Technology, School of Petrochemical Engineering, Changzhou University, Changzhou, Jiangsu, 213164, P. R. China

<sup>b</sup> Oakland International Associated Laboratory, School of Photoelectric Engineering, Changzhou Institute of Technology, Changzhou, Jiangsu, 213032, P. R. China

<sup>c</sup> Department of Applied Chemistry, Osaka Metropolitan University, 1-1 Gakuen, Naka, Sakai, Osaka 599-8531, Japan

<sup>d</sup> Analysis and Testing Center, NERC Biomass of Changzhou University, Jiangsu, 213032, PR China

---

\*Corresponding author.

Tel: +86 519 86330239

E-mail address: [jiangding@cczu.edu.cn](mailto:jiangding@cczu.edu.cn) (D. Jiang); [zdchen@cczu.edu.cn](mailto:zdchen@cczu.edu.cn) (Z. Chen)

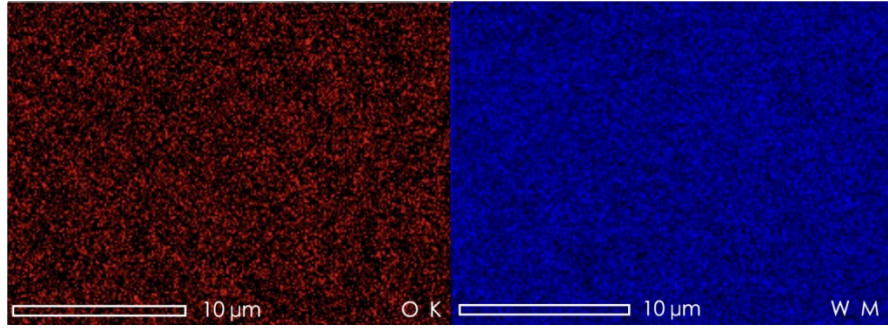

**Fig. S1 EDS element mapping of WO<sub>3</sub> film.**

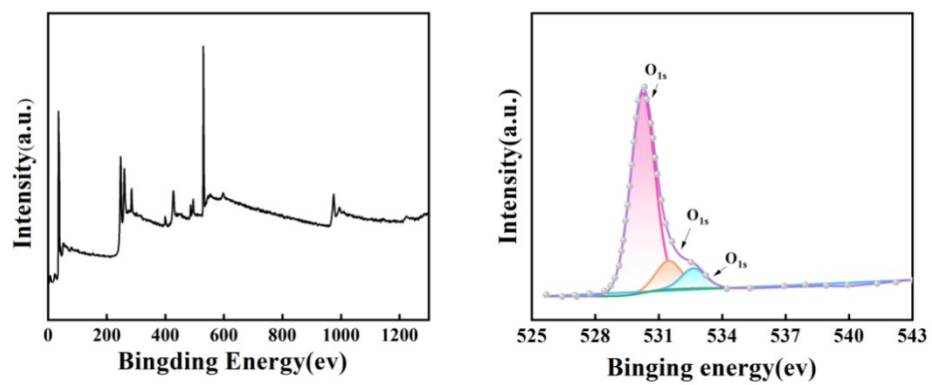

Fig. S2 XPS survey and O<sub>1s</sub> spectra of WO<sub>3</sub> film.

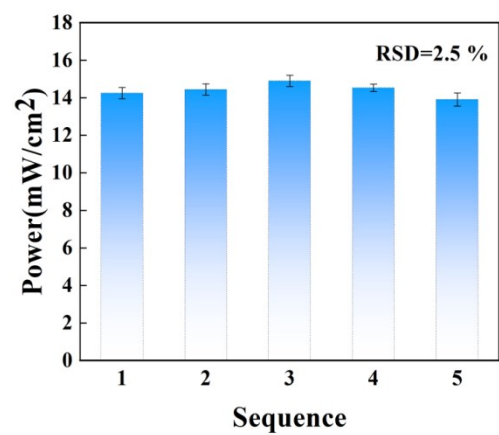

**Fig. S3 Reproducibility of self powered aptasensor**
